# Supplementary material for: Enhancer–gene maps in the human and zebrafish genomes using evolutionary linkage conservation
Source: PubMed Central journal article supplement — Nucleic Acids Res. 2020 Jan 16;48(5):2357–71. doi: 10.1093/nar/gkz1199 (PMC7049698; doi:10.1093/nar/gkz1199), 2020-01-16
Supplement: gkz1199_supplemental_file.pdf [file gkz1199_supplemental_file.pdf]

# Enhancer-gene maps in the human and zebrafish genomes using evolutionary linkage conservation - Supplementary information

Yves Clément, Patrick Torbey, Pascale Gilardi-Hebenstreit & Hugues Roest Crolius

## 1 Supplemental Text

### 1.1 Text S1: alignment parameters

Zebrafish-centred multiple alignments were built using LastZ [1] and Multiz [2]. Genomes used are indicated in Tables S3 & S4. We aligned zebrafish to all six species using the same parameters. Alignment parameters were as follows: step=1, masking=0, seed=12of19 (with transitions allowed), hsp threshold=3000, ydrop=3400, gapped threshold=3000, inner=0, with gap opening and extending gaps of 400 and 30. The standard HoxD55 score matrix was used for scores. The chaining step was performed on alignments with a minimum score of 0 with a loose linear gap matrix. Chained alignments were processed into nets from which best chain alignments were extracted (as indicated on the UCSC website). Pairwise alignments were merged together using Multiz. All blocks (all parameter) of minimum length 1 (R parameter) were kept.

### 1.2 Text S2: Long-range regulatory interactions within TADs

Topologically Associating Domains (TADs [3]) have been shown to coincide well with the regulatory landscape governing gene expression [4, 5]. Here, for CNEs linked to a single gene, 57% and 66% of predicted interactions indeed reside within a TAD in hESCs and IMR90 cells respectively [3], compared to an average of 32% and 41% respectively when we shuffle TAD intervals (proportion test p-values  $< 10^{-324}$  for both cell types). CNEs are linked to their target gene with a higher score when inside the same TAD (mean scores, 0.72 inside vs 0.67 outside for hESCs, 0.71 vs 0.68 for IMR90, Wilcoxon rank sum test p-values  $< 10^{-324}$  for both cell types), overlapped more with functional marks (14% vs 10% for H3K4me1 & 15% vs 11% for H3K27ac in hESCs, 13% vs 10% for H3K4me1 & 10% vs 15% for H3K27ac in IMR90, all proportion tests p-values  $< 10^{-133}$ ) and were also closer to each other (median distance to TSS, 332 kb inside vs 522 kb outside for hESCs, 355 kbp vs 524 kbp for IMR90, Wilcoxon rank sum test p-values  $< 10^{-324}$  for both cell types).

Finally, we see a striking link between the across species conservation of CNEs and their localisation within a TAD. First, human-zebrafish orthologous CNE-target gene pairs (human-zebrafish orthologous genes with conserved CNEs) are more often located within a TAD than expected by chance (proportion tests p-values  $< 10^{-30}$  for both hESCs and IMR90 cells). More importantly, we see a positive link between the conservation depth of CNEs and the co-localisation of CNEs and target genes within the same TAD. The association between TAD co-localisation and both distance to TSS and conservation depth cannot be explained by chance alone. These results, in line with previous observations [6], show evolutionary conservation of linkage between CNEs and their target genes is consistent with topological organisation of chromatin.

### 1.3 Text S3: Choosing a radius

PEGASUS was previously developed to predict regulatory interactions in one genome. Applying this tool to two genomes of different sizes (approximately 3 Gb for human and 1.5 Gb for zebrafish) raises the issue of the 1Mb radius to assign target genes to CNEs in both genomes. By arbitrarily setting this radius to a pre-defined value, one runs the risk of missing functional regulatory interactions located beyond this limit. We predict, however, that increasing this radius will have a negative effect on predicted interactions, as synteny conservation is more difficult to maintain over longer genomic distances. We generated CNE-target gene predictions setting the radius to a range of values between 300kbp to 2Mb in zebrafish. While the number of predicted CNEs and target genes increases linearly with the radius, the absolute unnormalized linkage score plateaus between 500kbp and 800kbp (Figure S7). We thus chose a radius of 1Mb as a compromise between the number of predicted interactions and their quality in zebrafish. In order to avoid biases in conservation of distances analyses, we chose the same radius for the human genome.

## 2 Supplementary Tables

| <i>hg19</i>                               |           | <i>danRer7</i>                    |           |
|-------------------------------------------|-----------|-----------------------------------|-----------|
| <i>anatomy term</i>                       | <i>fe</i> | <i>anatomy term</i>               | <i>fe</i> |
| endothelial cell                          | 1.56      | dorsal thalamus                   | 8.89      |
| lining cell                               | 1.56      | blood vessel endothelium          | 6.85      |
| barrier cell                              | 1.56      | cardiovascular system endothelium | 6.49      |
| meso-epithelial cell                      | 1.56      | pretectal region                  | 6.47      |
| frontal pole                              | 1.47      | vestibulocochlear ganglion        | 5.98      |
| pole of cerebral hemisphere               | 1.47      | preoptic area                     | 5.94      |
| endothelial cell of viscerocranial mucosa | 1.40      | brain ventricle/choroid plexus    | 5.94      |
| buccal mucosa cell                        | 1.40      | brain ventricle                   | 5.94      |
| cardiac muscle tissue                     | 1.39      | ventricular system of brain       | 5.94      |
| myocardium of atrium                      | 1.39      | spinal cord interneuron           | 5.92      |

**Table S 1:** Top 10 overrepresented anatomy terms (TopAnat [7]) in human genes with conserved regulation with zebrafish. *fe*: fold enrichment. All terms have a false discovery rate lower than 0.002.

| <i>hg19</i>                                              |           | <i>danRer7</i>                                                       |           |
|----------------------------------------------------------|-----------|----------------------------------------------------------------------|-----------|
| <i>GO term</i>                                           | <i>fe</i> | <i>GO term</i>                                                       | <i>fe</i> |
| ventral spinal cord interneuron differentiation          | 14.02     | potassium ion import                                                 | 11.28     |
| positive regulation of heart growth                      | 12.46     | central nervous system neuron differentiation                        | 7.06      |
| positive regulation of cardiac muscle cell proliferation | 11.89     | embryonic cranial skeleton morphogenesis                             | 5.88      |
| positive regulation of cardiac muscle tissue growth      | 11.60     | cranial skeletal system development                                  | 5.71      |
| central nervous system projection neuron axonogenesis    | 11.38     | embryonic skeletal system morphogenesis                              | 5.71      |
| proximal/distal pattern formation                        | 9.35      | embryonic skeletal system development                                | 5.3       |
| positive regulation of organ growth                      | 9.14      | skeletal system morphogenesis                                        | 5.26      |
| cell fate determination                                  | 8.90      | cell fate commitment                                                 | 4.88      |
| positive regulation of cardiac muscle tissue development | 8.63      | skeletal system development                                          | 4.33      |
| regulation of heart growth                               | 8.06      | positive regulation of transcription from RNA polymerase II promoter | 4.19      |

**Table S 2:** Top 10 overrepresented Gene Ontology [8] terms in human genes with conserved regulation with zebrafish. *fe*: fold enrichment. All terms have a false discovery rate lower than 0.05

| <b>Common name</b>       | <b>Species name</b>               | <b>Version</b> | <b>LCA</b>       | <b>Genome size</b> | <b>control set</b> |
|--------------------------|-----------------------------------|----------------|------------------|--------------------|--------------------|
| Human                    | <i>Homo sapiens</i>               | hg19           | NA               | 3327               | *                  |
| Chimp                    | <i>Pan troglodytes</i>            | panTro4        | HomoPan          | 2996               |                    |
| Gorilla                  | <i>Gorilla gorilla</i>            | gorGor3        | Homininae        | 2829               |                    |
| Orangutan                | <i>Pongo abelii</i>               | ponAbe2        | Hominidae        | 3109               |                    |
| Gibbon                   | <i>Nomascus leucogenys</i>        | nomLeu3        | Hominoidea       | 2757               |                    |
| Rhesus                   | <i>Macaca mulatta</i>             | rheMac3        | Catarrhini       | 3094               |                    |
| Marmoset                 | <i>Callithrix jacchus</i>         | calJac3        | Simiiformes      | 2759               |                    |
| Bushbaby                 | <i>Otolemur garnettii</i>         | otoGar3        | Primates         | 2359               |                    |
| Squirrel                 | <i>Ictidomys tridecemlineatus</i> | speTri2        | Euarchontoglires | 2311               |                    |
| Mouse                    | <i>Mus musculus</i>               | mm10           | Euarchontoglires | 3482               |                    |
| Rat                      | <i>Rattus norvegicus</i>          | rn5            | Euarchontoglires | 3042               |                    |
| Guinea pig               | <i>Cavia porcellus</i>            | cavPor3        | Euarchontoglires | 2663               |                    |
| Rabbit                   | <i>Oryctolagus cuniculus</i>      | oryCun2        | Euarchontoglires | 2604               |                    |
| Pig                      | <i>Sus scrofa</i>                 | susScr3        | Boreoeutheria    | 3025               |                    |
| Cow                      | <i>Bos taurus</i>                 | bosTau7        | Boreoeutheria    | 2650               |                    |
| Sheep                    | <i>Ovis aries</i>                 | oviAri3        | Boreoeutheria    | 2534               |                    |
| Horse                    | <i>Equus caballus</i>             | equCab2        | Boreoeutheria    | 2429               |                    |
| Cat                      | <i>Felis catus</i>                | felCat5        | Boreoeutheria    | 2366               |                    |
| Dog                      | <i>Canis lupus familiaris</i>     | canFam3        | Boreoeutheria    | 2393               |                    |
| Ferret                   | <i>Mustela putorius furo</i>      | musFur1        | Boreoeutheria    | 2278               |                    |
| Panda                    | <i>Ailuropoda melanoleuca</i>     | ailMel1        | Boreoeutheria    | 2245               |                    |
| Microbat                 | <i>Myotis lucifugus</i>           | myoLuc2        | Boreoeutheria    | 1966               |                    |
| Elephant                 | <i>Loxodonta africana</i>         | loxAfr3        | Eutheria         | 3119               |                    |
| Armadillo                | <i>Dasybus novemcinctus</i>       | dasNov3        | Eutheria         | 3300               |                    |
| Opossum                  | <i>Monodelphis domestica</i>      | monDom5        | Theria           | 3502               |                    |
| Tasmanian devil          | <i>Sarcophilus harrisii</i>       | sarHar1        | Theria           | 2932               |                    |
| Platypus                 | <i>Ornithorhynchus anatinus</i>   | ornAna1        | Mammalia         | 1918               |                    |
| Zebra finch              | <i>Taeniopygia guttata</i>        | taeGut2        | Amniota          | 1223               | *                  |
| Mallard duck             | <i>Anas platyrhynchos</i>         | anaPla1        | Amniota          | 1070               | *                  |
| Chicken                  | <i>Gallus gallus</i>              | galGal4        | Amniota          | 1073               | *                  |
| Turkey                   | <i>Meleagris gallopavo</i>        | melGal1        | Amniota          | 1062               | *                  |
| Chinese softshell turtle | <i>Pelodiscus sinensis</i>        | pelSin1        | Amniota          | 2107               |                    |
| Lizard                   | <i>Anolis carolinensis</i>        | anoCar2        | Amniota          | 1701               | *                  |
| Xenopus                  | <i>Xenopus tropicalis</i>         | xenTro7        | Tetrapoda        | 1358               | *                  |
| Coelacanth               | <i>Latimeria chalumnae</i>        | latCha1        | Sarcopterygii    | 2184               |                    |

**Table S 3:** List of species used for PEGASUS predictions in the human genome. Species used to test the effects of phylogenetic sampling are indicated in the column "used in control set". LCA: last common ancestor with human. Genome sizes are indicated in Mb

| <b>Common name</b> | <b>Species name</b>           | <b>Version</b> | <b>LCA</b>    | <b>Genome size</b> |
|--------------------|-------------------------------|----------------|---------------|--------------------|
| Zebrafish          | <i>Danio rerio</i>            | danRer7        | NA            | 1412               |
| Medaka             | <i>Oryzias latipes</i>        | oryLat2        | Clupeocephala | 869                |
| Tetraodon          | <i>Tetraodon nigroviridis</i> | tetNig2        | Clupeocephala | 359                |
| Fugu               | <i>Takifugu rubripes</i>      | fr3            | Clupeocephala | 391                |
| Stickleback        | <i>Gasterosteus aculeatus</i> | gasAcu1        | Clupeocephala | 462                |
| Gar                | <i>Lepisosteus oculatus</i>   | lepOcu1        | Neopterygii   | 946                |
| Nile tilapia       | <i>Oreochromis niloticus</i>  | oreNil2        | Clupeocephala | 927                |

**Table S 4:** List of species used for PEGASUS predictions in the zebrafish genome. LCA: last common ancestor with human. Genome sizes are indicated in Mb

### 3 Supplementary Figures

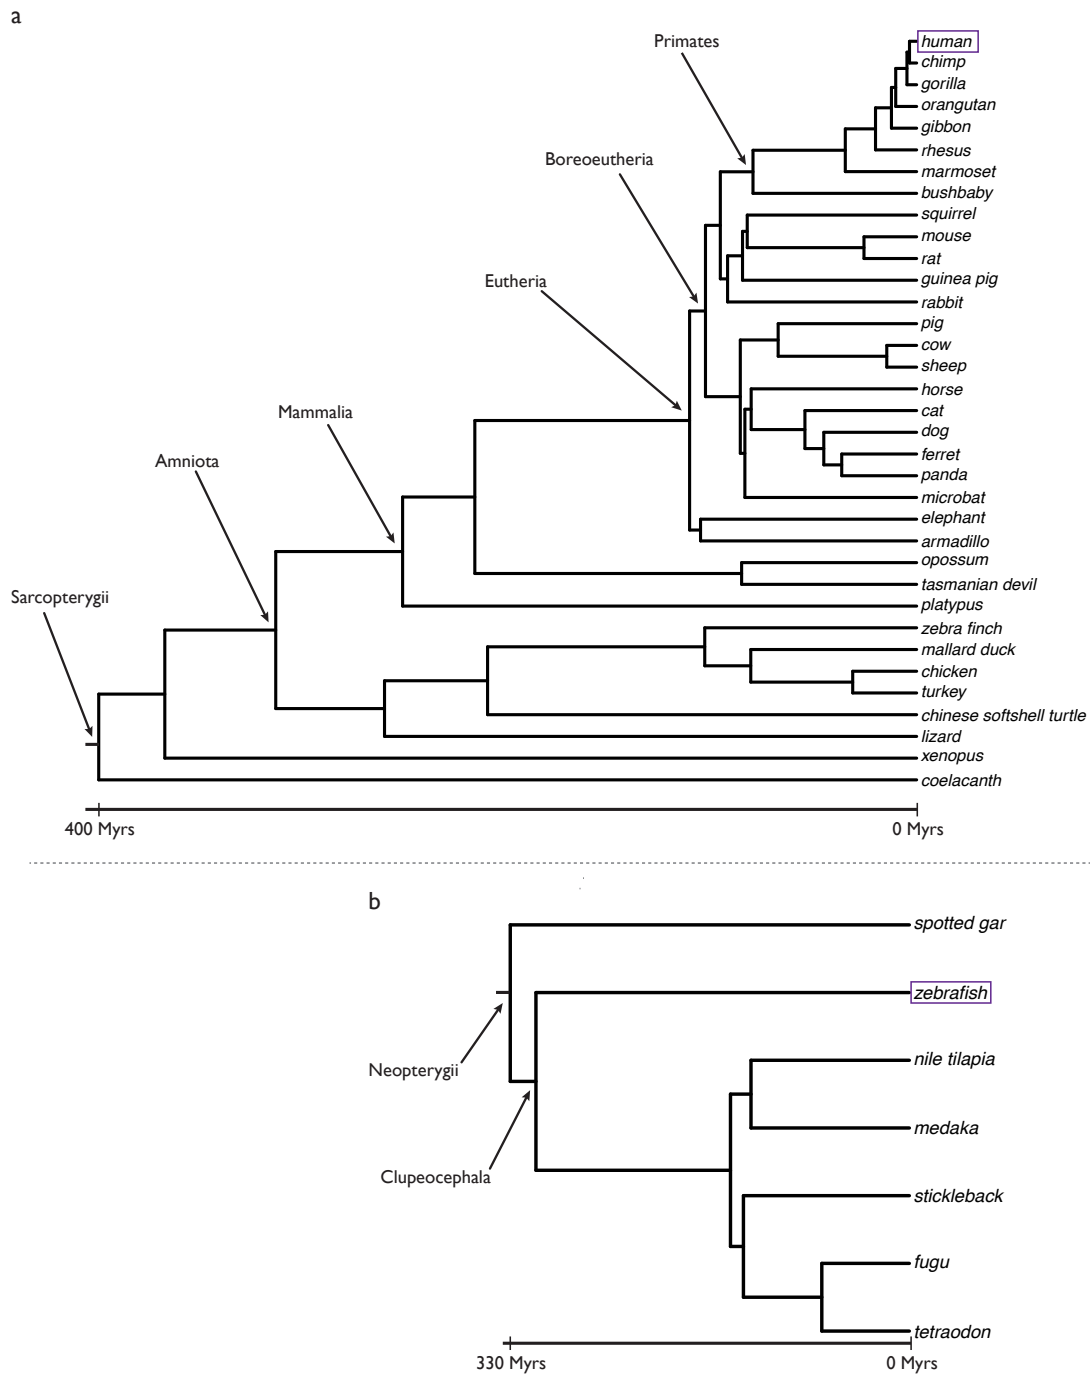

**Figure S 1: Phylogenetic relationships between species used in for PEGASUS.** (a) Phylogenetic relationship for the species used for the human, adapted from the tree used by the UCSC genome portal [9]. (b) The zebrafish tree was computed on a random set of 50 1-to-1 orthologous proteins using PhyML [10]. Both trees were made ultrametric using the APE package in R [11].

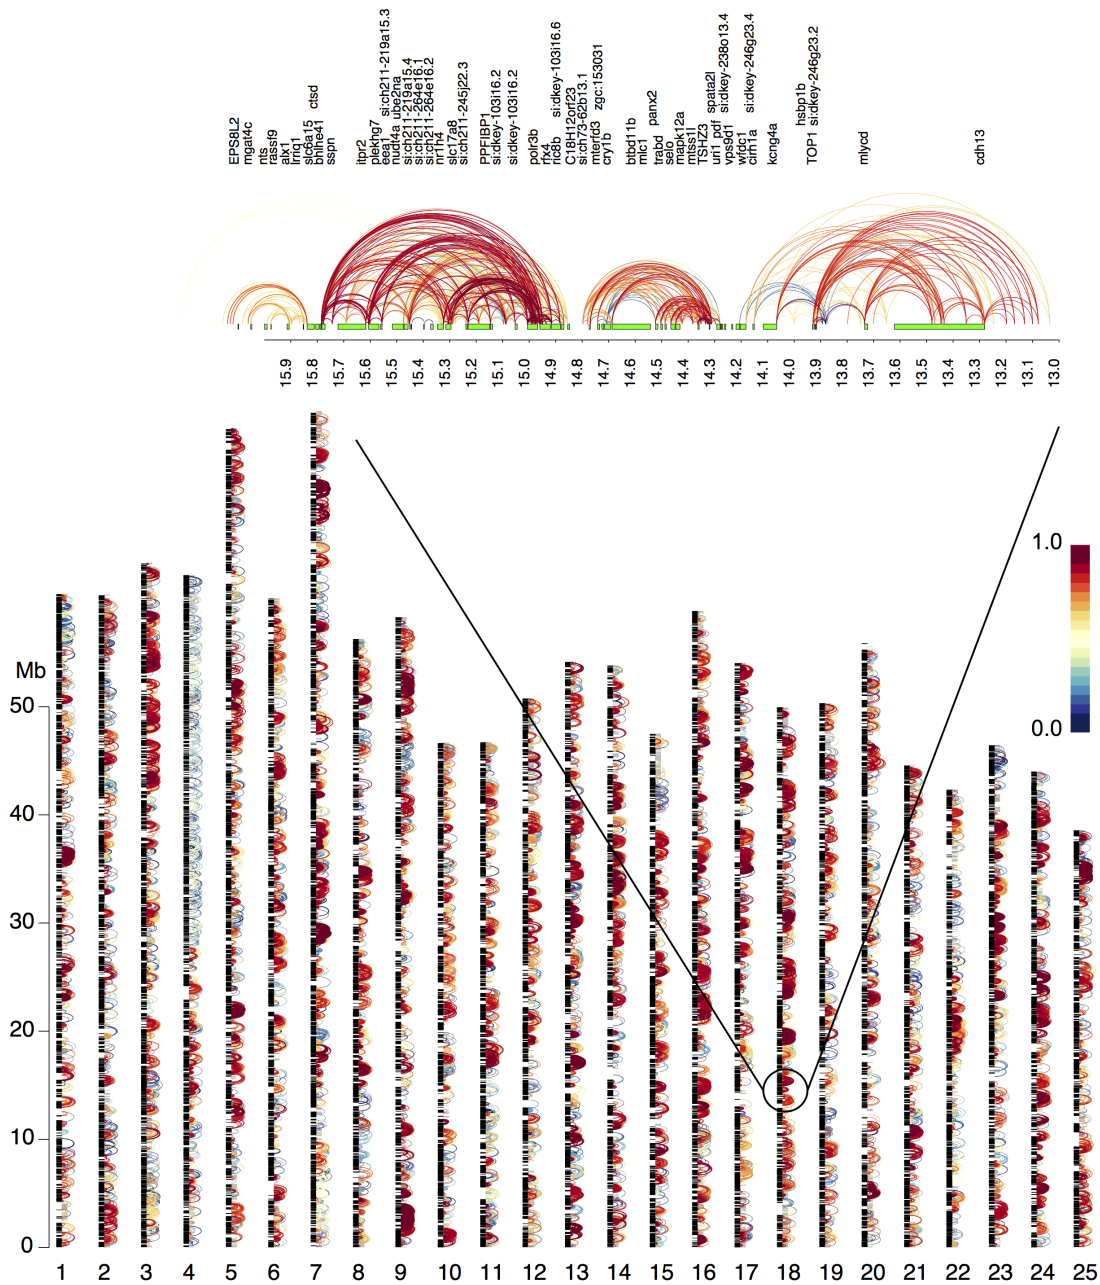

**Figure S 2: Map of predicted enhancer-gene interactions in the zebrafish genome.** CNE-gene associations are coloured according to their linkage scores. The top panel shows a zoom of a 3Mb region of chromosome 18.

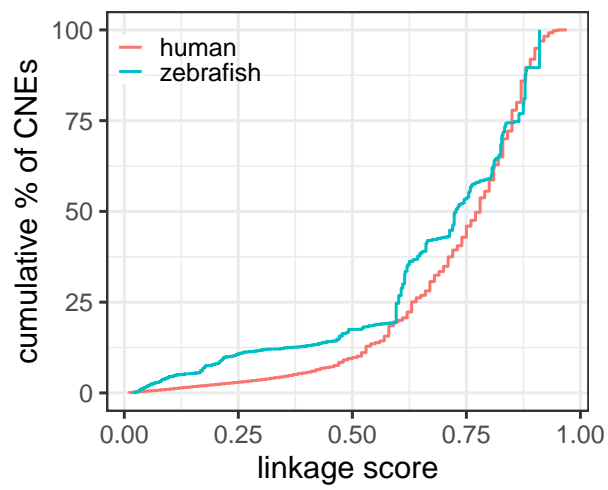

**Figure S 3: Distribution of linkage scores.** Cumulative distribution of linkage scores for the human and zebrafish genomes.

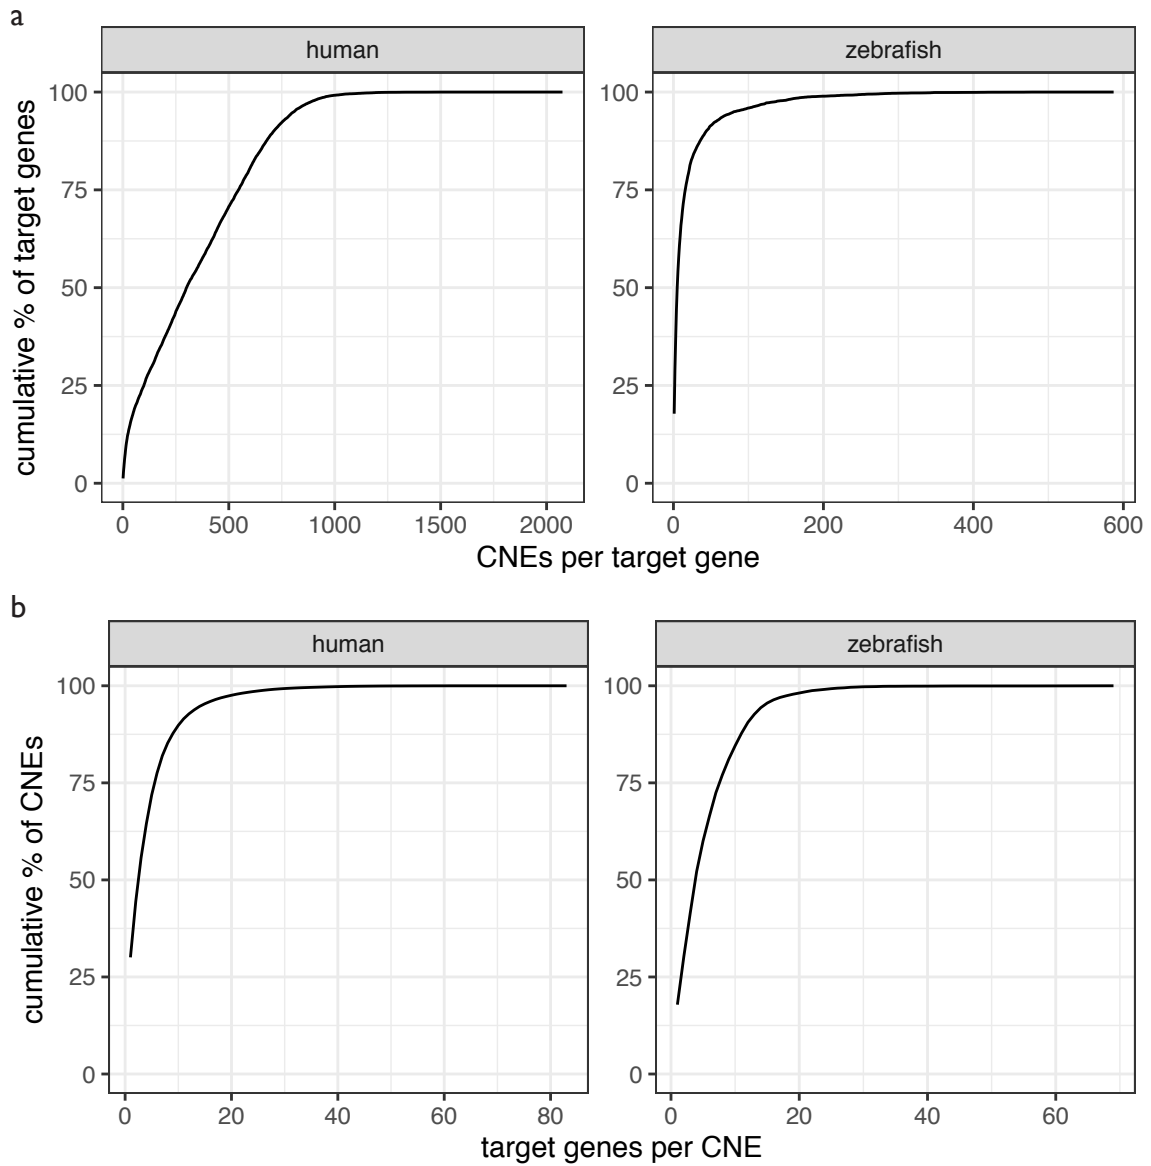

**Figure S 4: Number of CNEs per target and number of target per CNEs.** (a) Cumulative distribution of the number of CNEs per target gene in the human (left) and zebrafish (right) genomes. (b) Cumulative distribution of the number of target gene per CNEs in the human (left) and zebrafish (right) genomes.

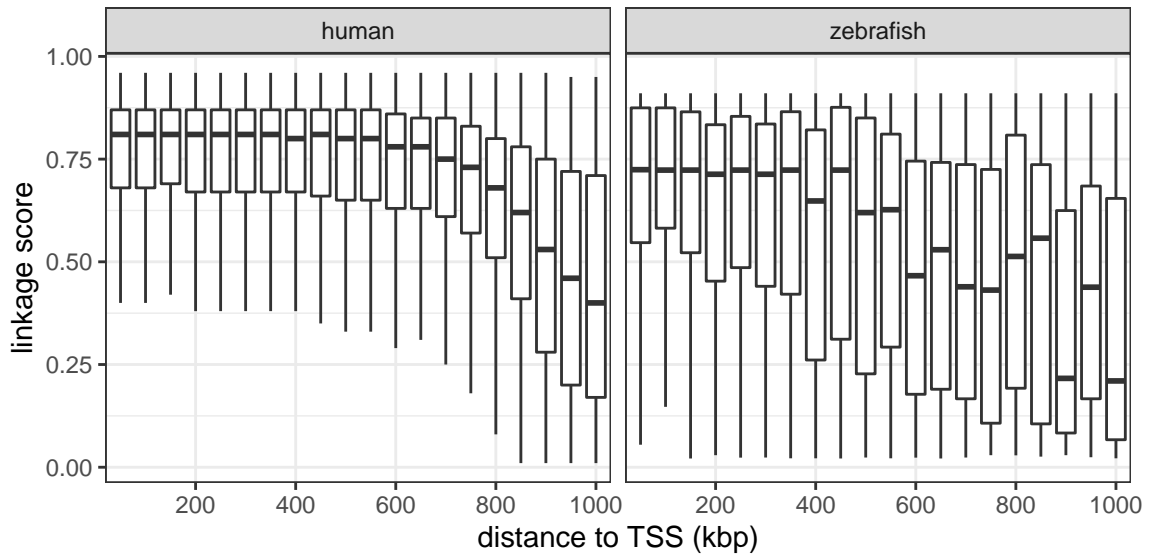

**Figure S 5: Link between distance to TSS and linkage score.** Histograms of CNEs' linkage score according to their distance to the TSS. Only CNEs with one target were considered.

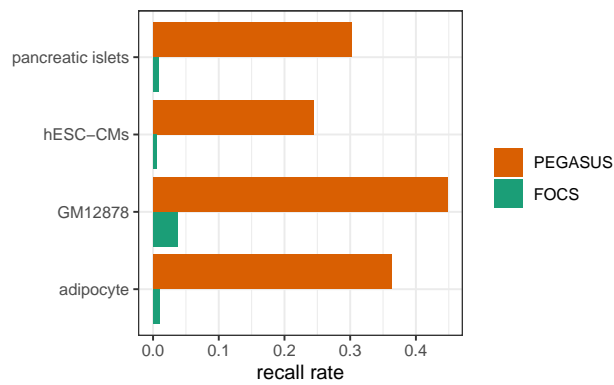

**Figure S 6: Recall rates for capture Hi-C data** Recall rates for four capture Hi-C datasets and FOCS (green) or the full PEGASUS dataset (orange).



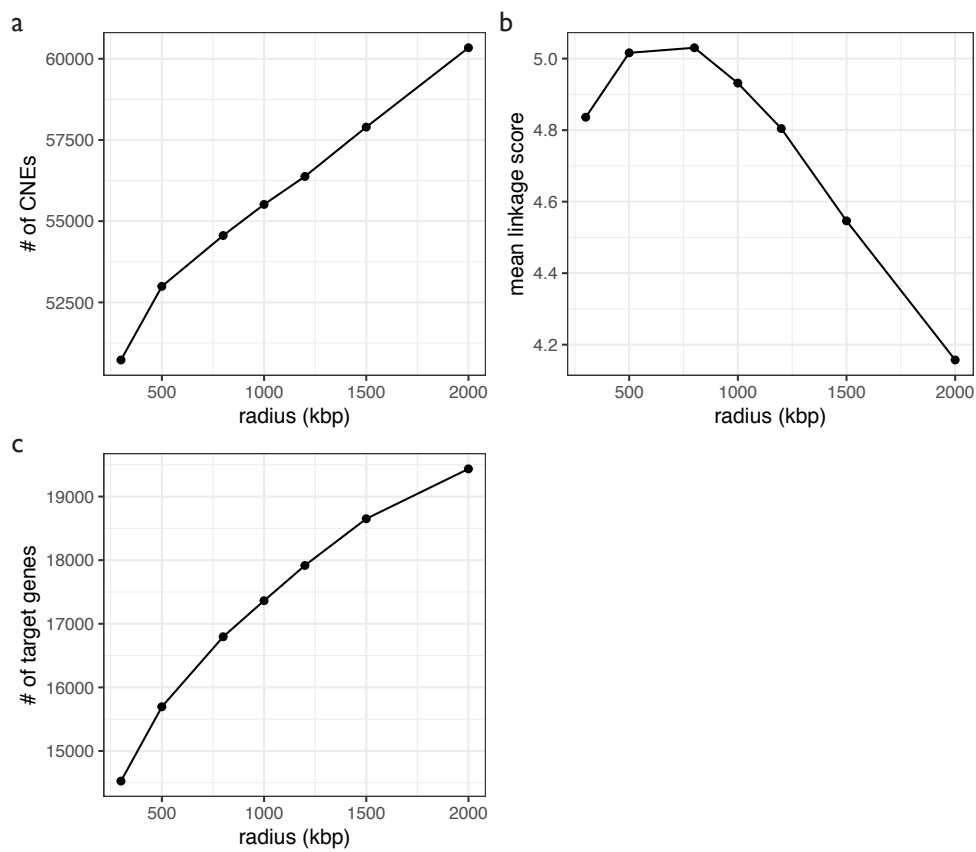

**Figure S 7: Effect of radius on PEGASUS predictions** (a) Number of CNEs linked to at least one target gene, (b) mean un-normalised linkage score and (c) total number of target genes as a function of the radius used for PEGASUS predictions in the zebrafish genome

## References

- [1] Schwartz, S. *et al.* Human-mouse alignments with BLASTZ. *Genome Res.* (2003).
- [2] Blanchette, M. *et al.* Aligning multiple genomic sequences with the threaded blockset aligner. *Genome Res.* (2004).
- [3] Dixon, J. R. *et al.* Topological domains in mammalian genomes identified by analysis of chromatin interactions. *Nature* (2012).
- [4] Lupiáñez, D. G. *et al.* Disruptions of topological chromatin domains cause pathogenic rewiring of gene-enhancer interactions. *Cell* (2015).
- [5] de Laat, W. & Duboule, D. Topology of mammalian developmental enhancers and their regulatory landscapes. *Nature* (2013).
- [6] Maeso, I., Acemel, R. D. & Gómez-Skarmeta, J. L. Cis-regulatory landscapes in development and evolution. *Curr. Opin. Genet. Dev.* (2017).
- [7] Bastian, F. *et al.* Bgee: Integrating and Comparing Heterogeneous Transcriptome Data Among Species. *Data Integration in the Life Sciences* (2008).
- [8] Mi, H., Muruganujan, A. & Thomas, P. D. PANTHER in 2013: modeling the evolution of gene function, and other gene attributes, in the context of phylogenetic trees. *Nucleic Acids Res.* (2013).
- [9] Kent, W. J. *et al.* The human genome browser at UCSC. *Genome Res.* (2002).
- [10] Guindon, S. *et al.* New algorithms and methods to estimate maximum-likelihood phylogenies: assessing the performance of PhyML 3.0. *Syst Biol.* (2010).
- [11] Paradis, E. & Schliep, K. ape 5.0: an environment for modern phylogenetics and evolutionary analyses in R. *Bioinformatics* **35**, 526–528 (2019).
